# Supplementary material
Source: PubMed Central journal article supplement (PMC5510602)

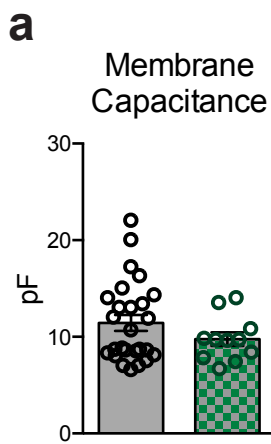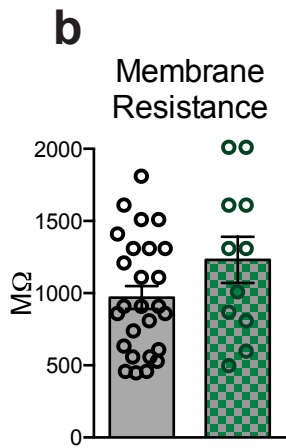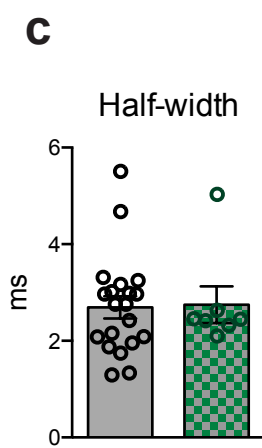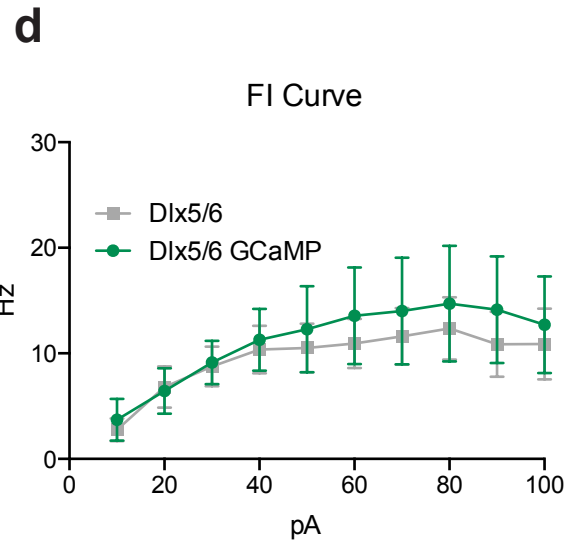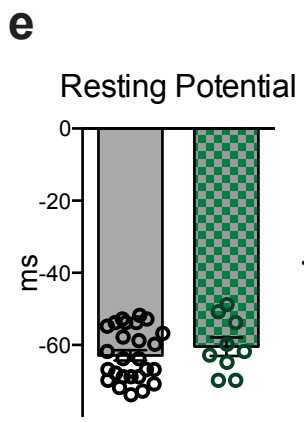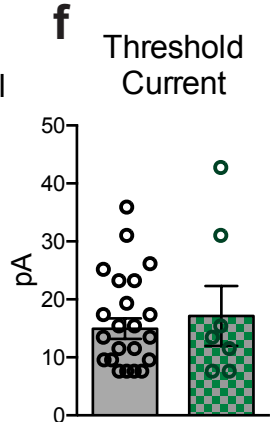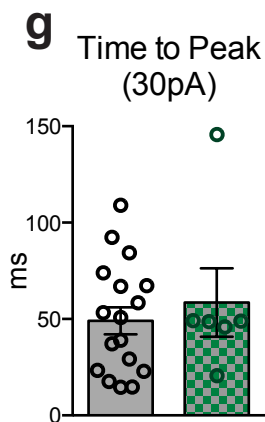

**a**  
Dlx5/6

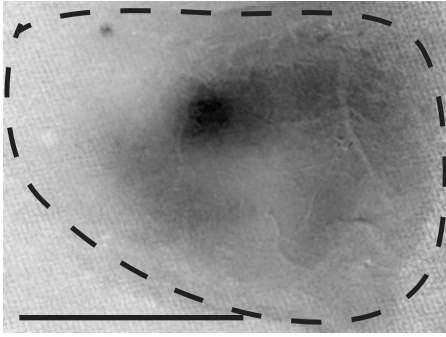

**b**  
CRHR

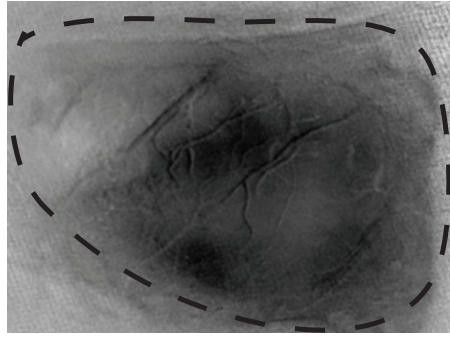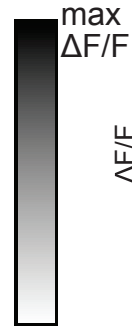

**c**

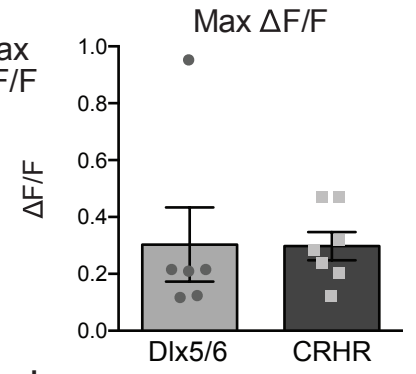

**d**

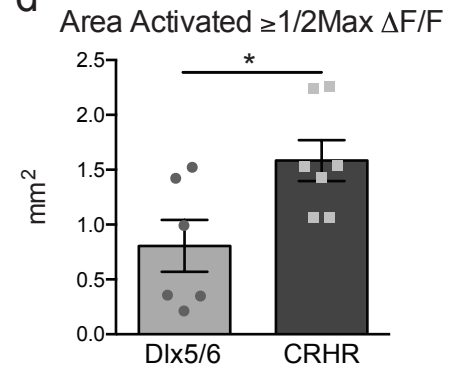

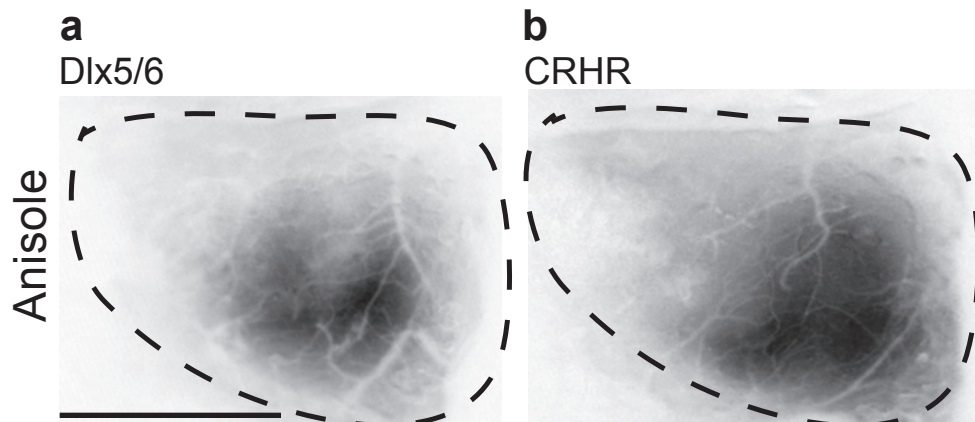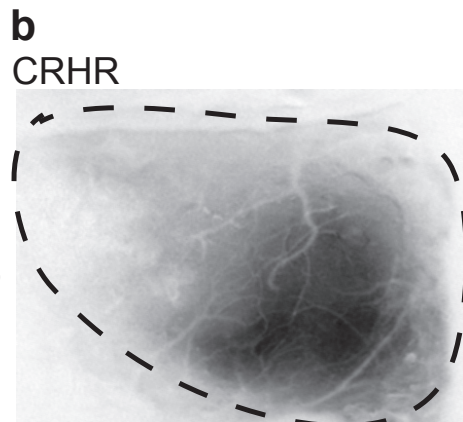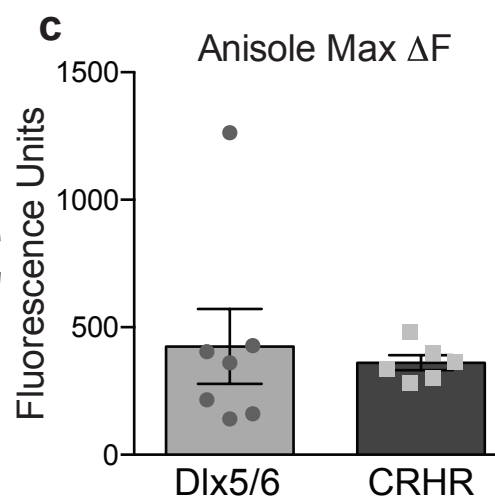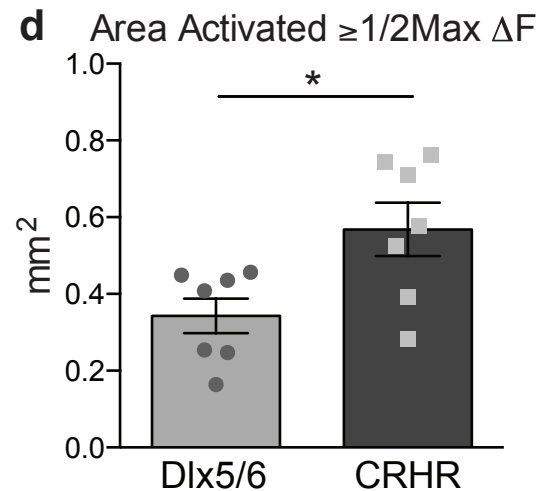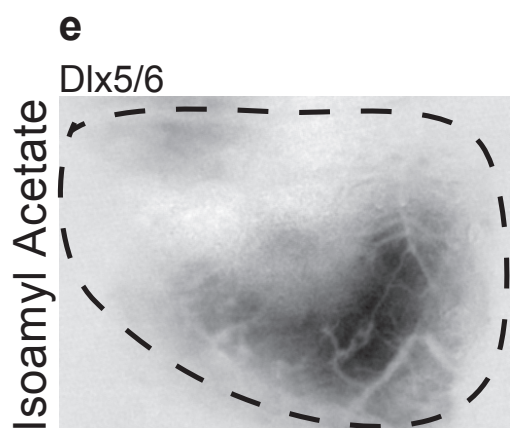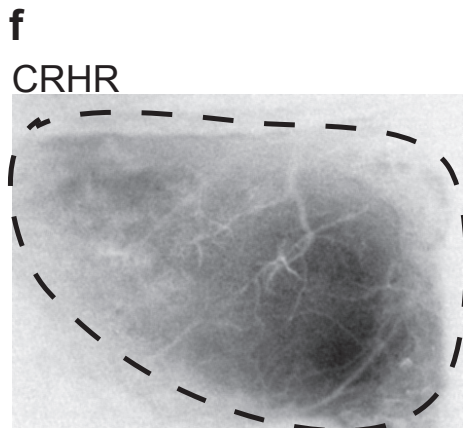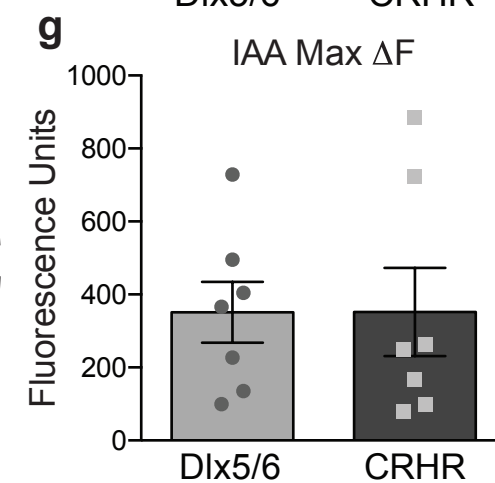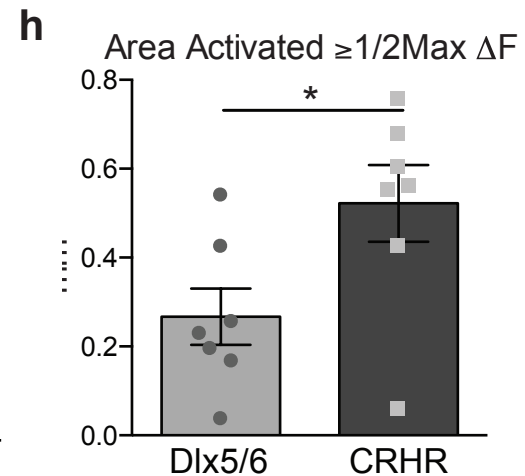

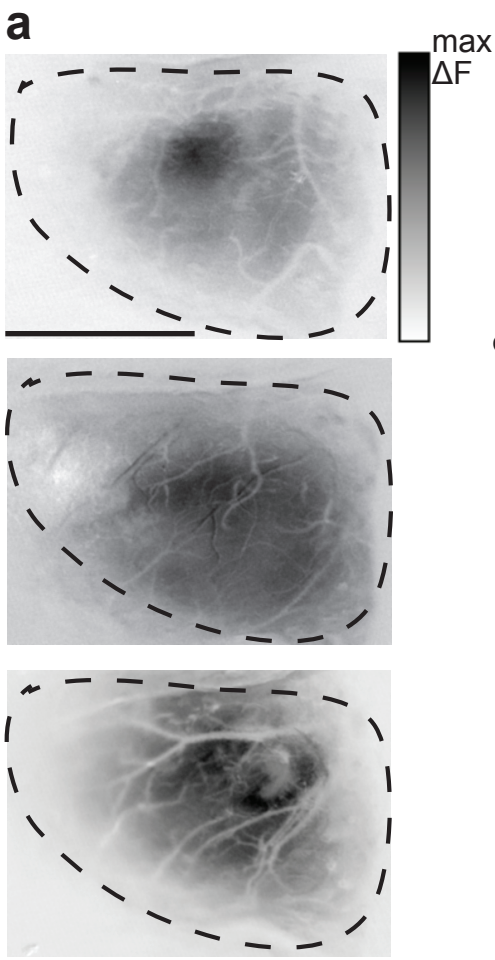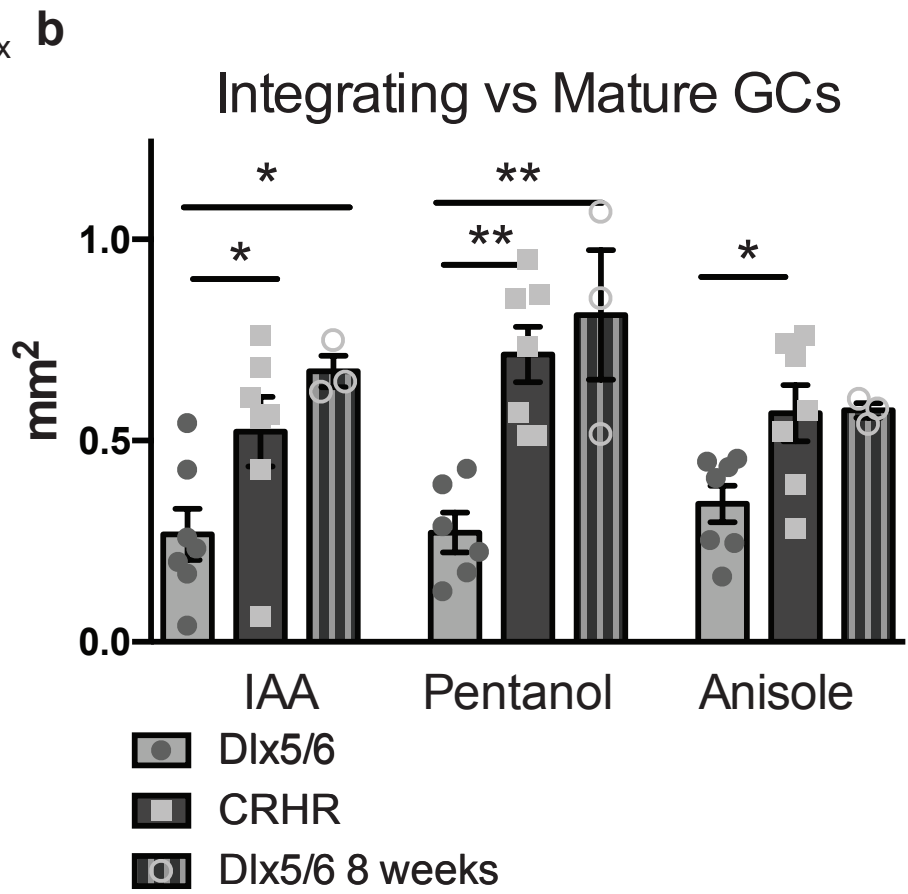

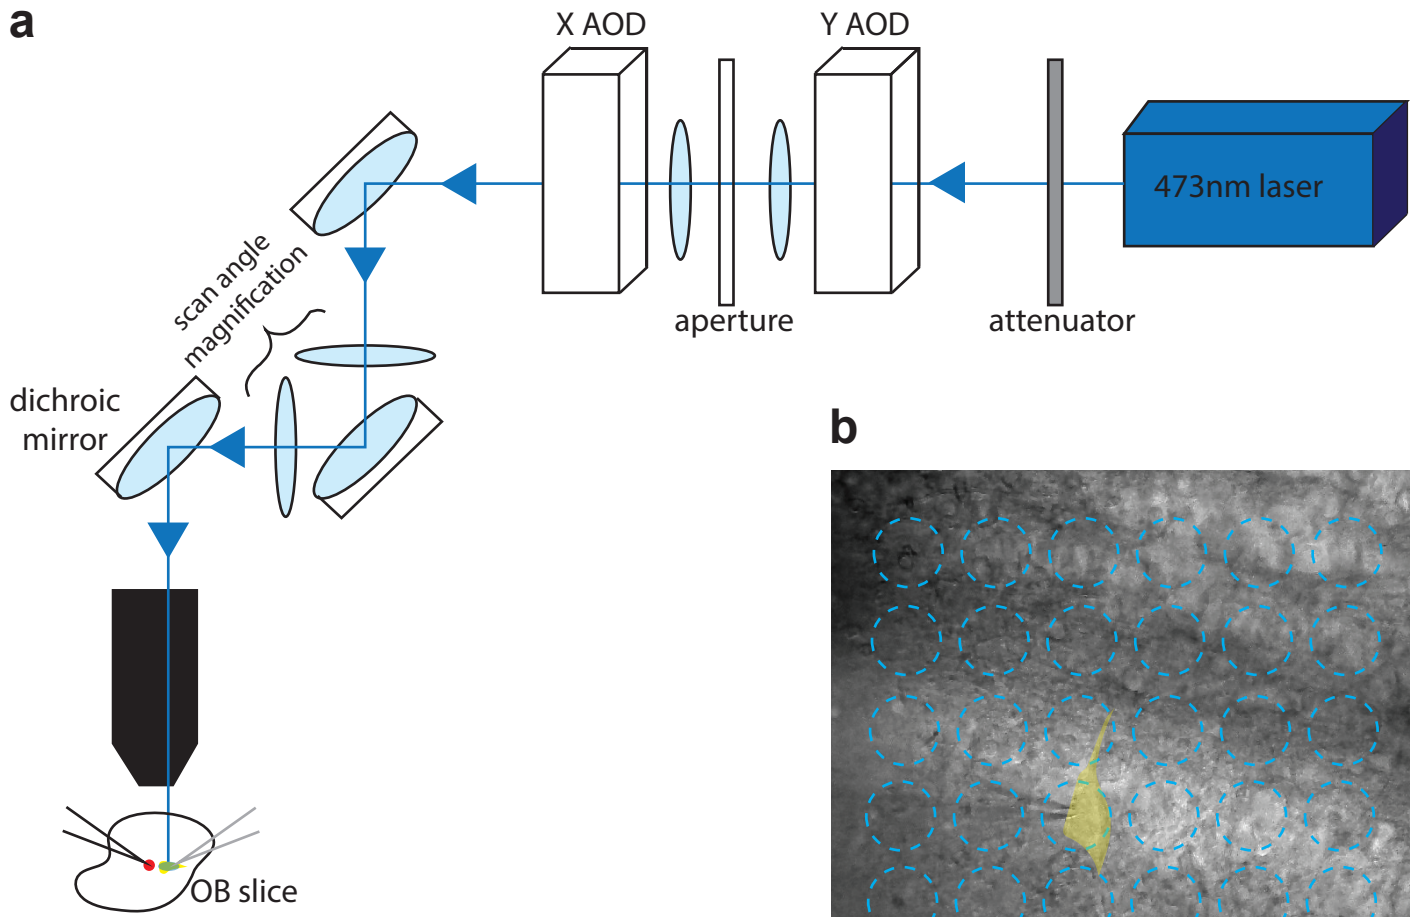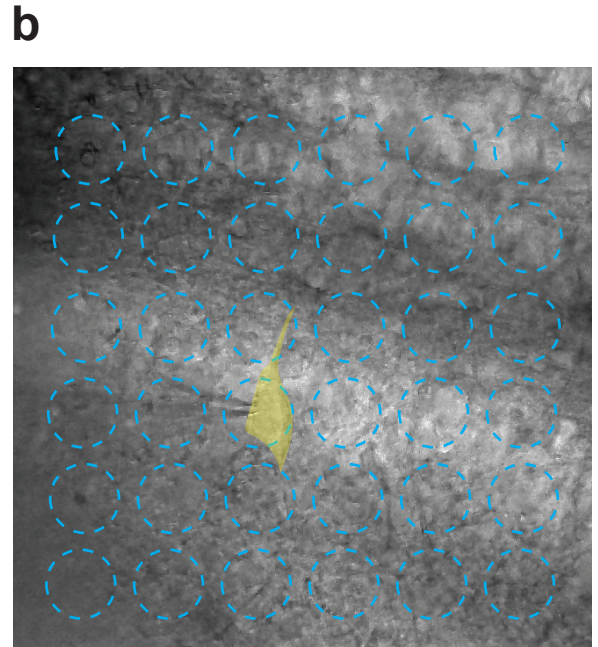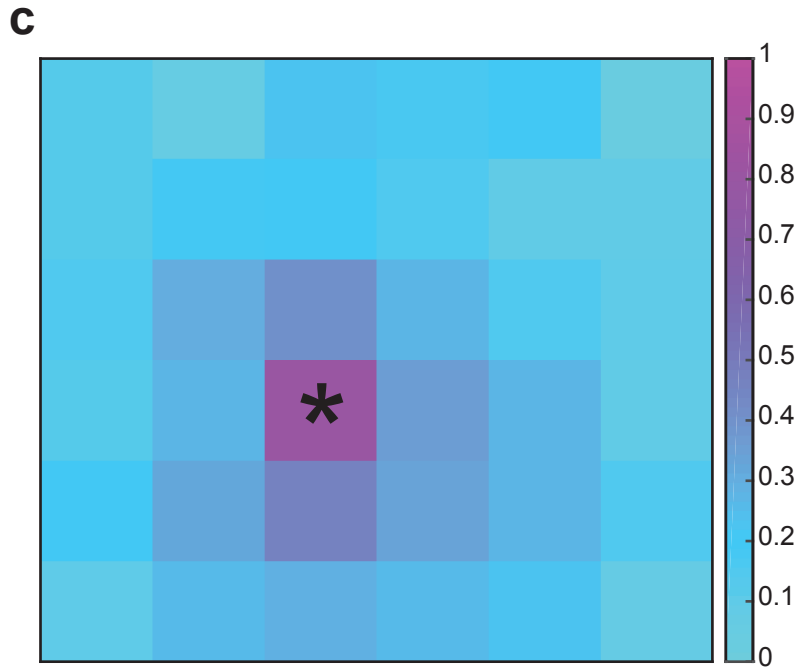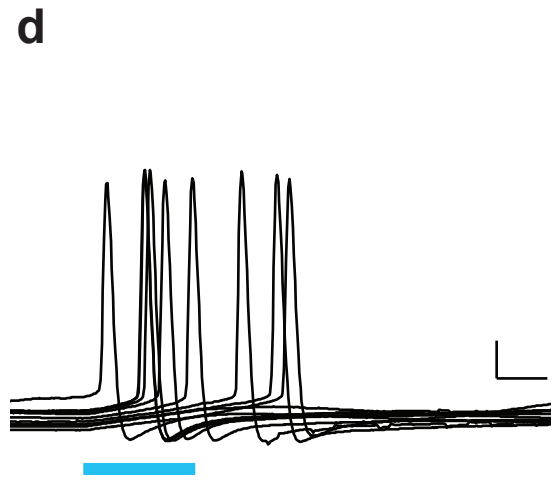

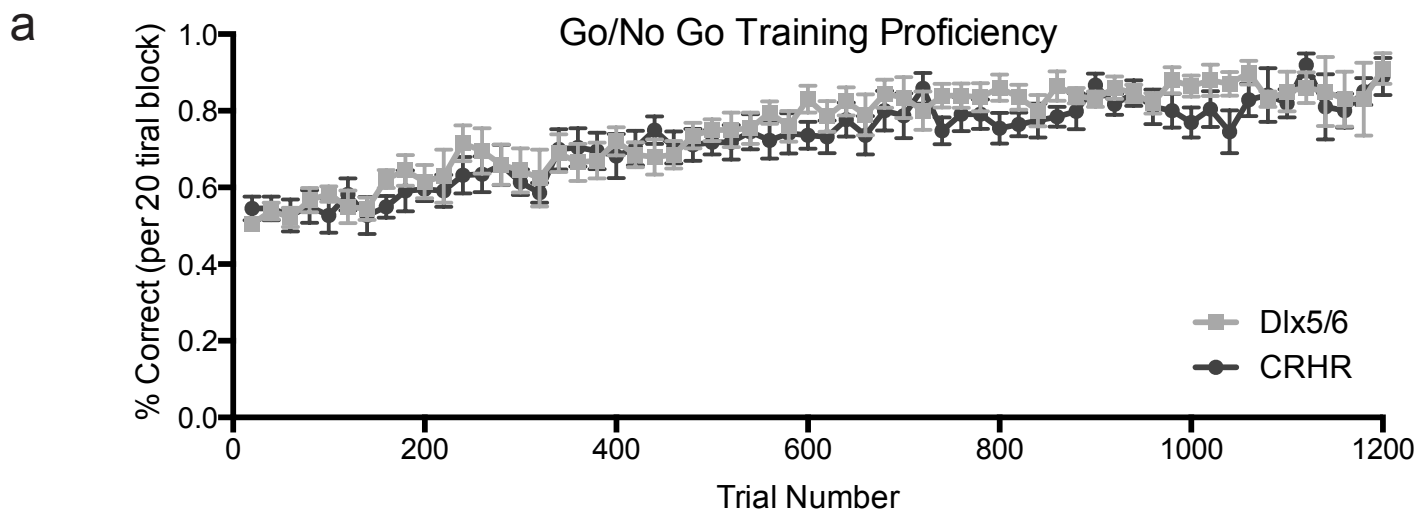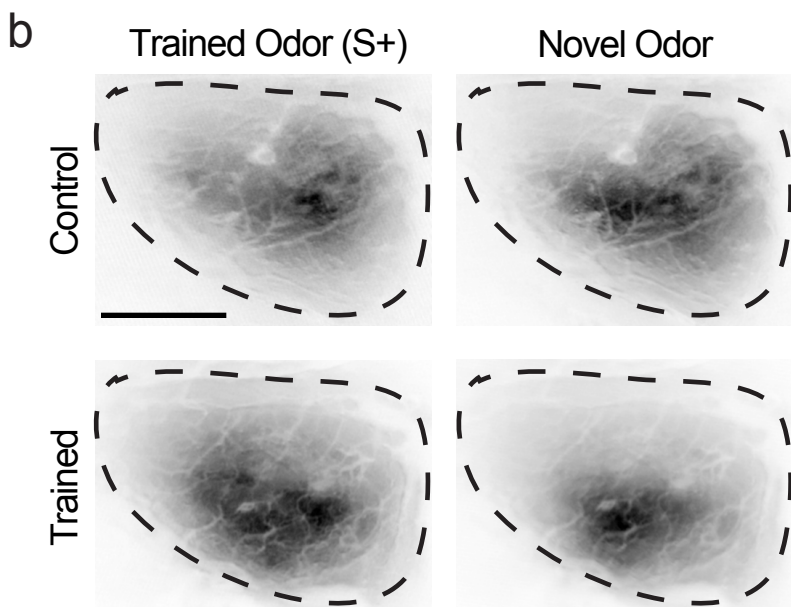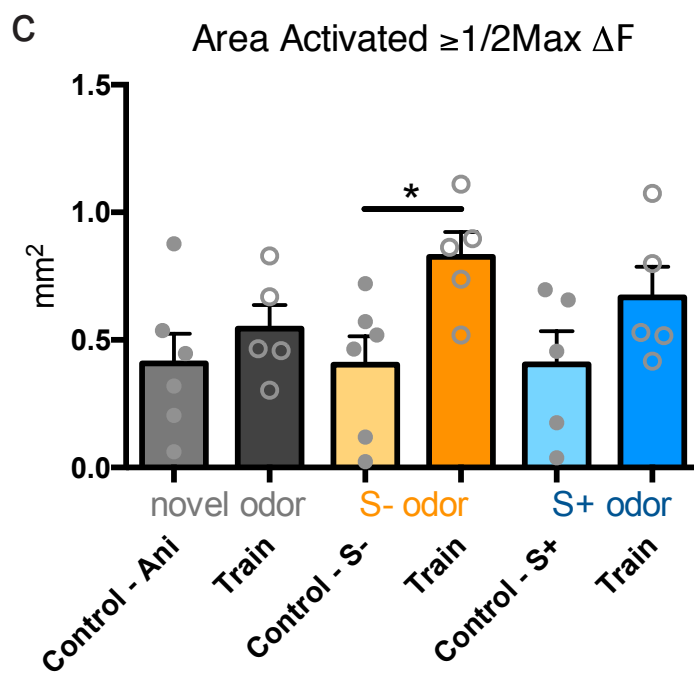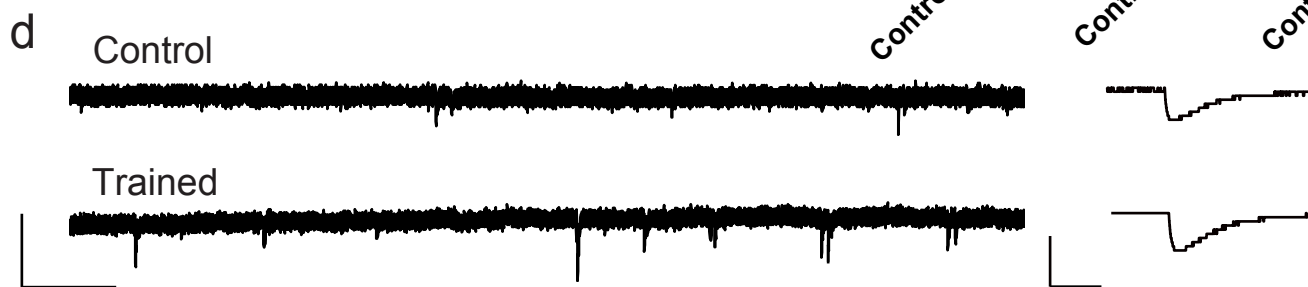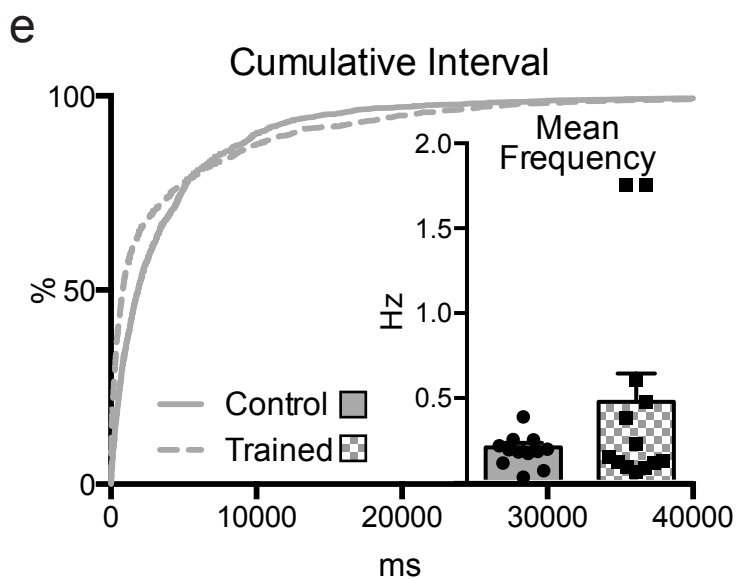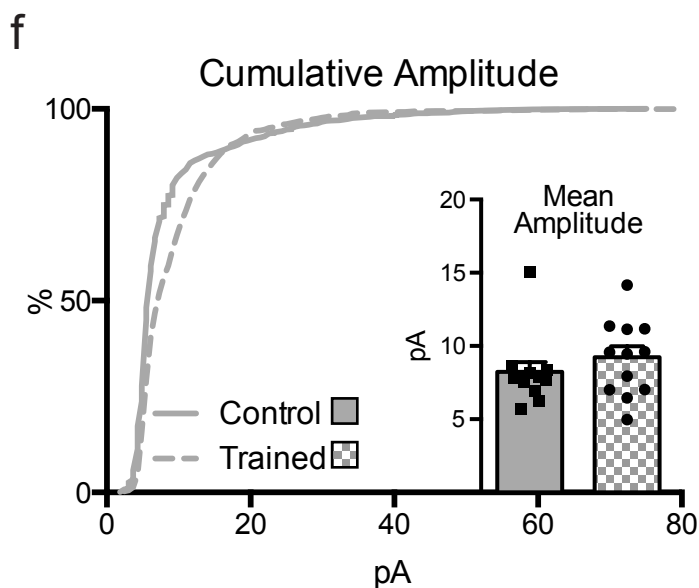

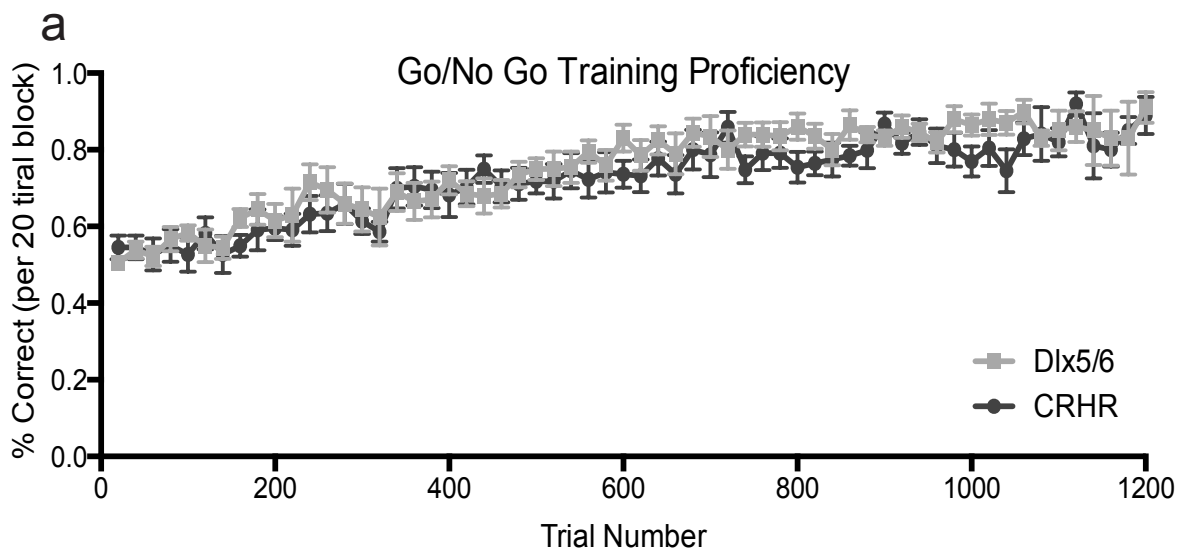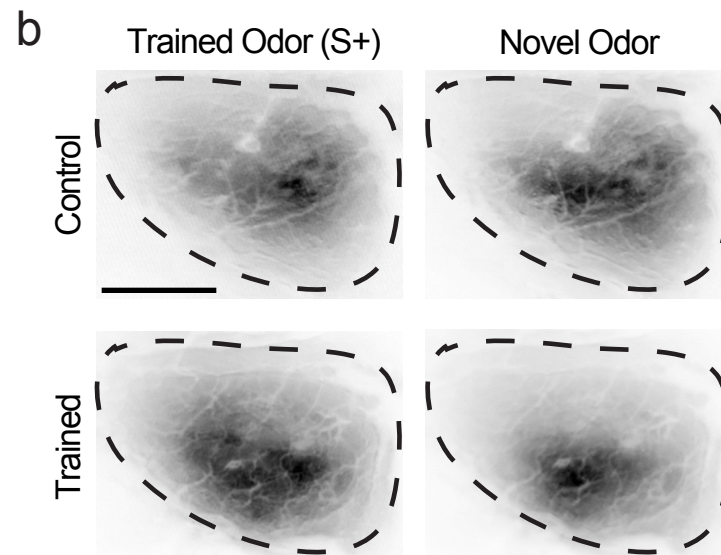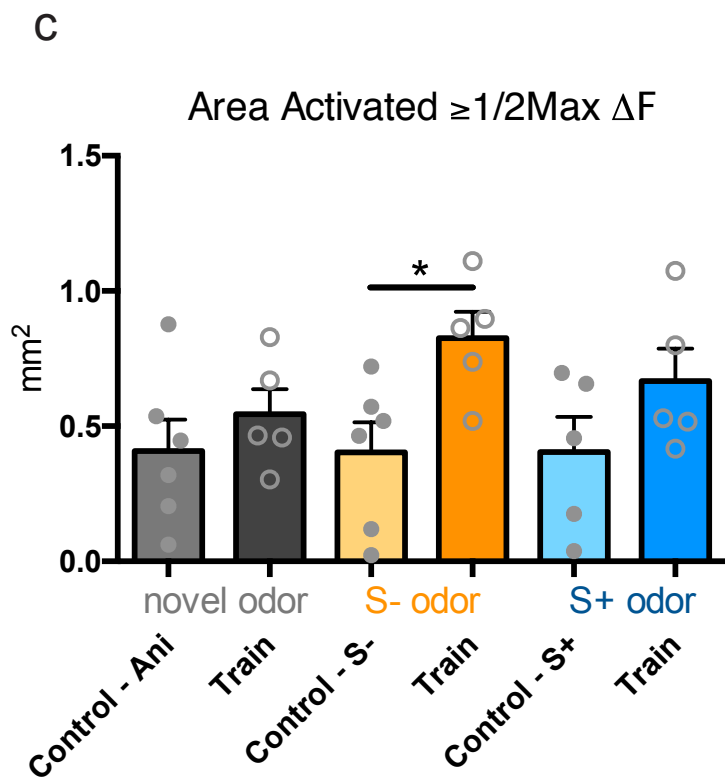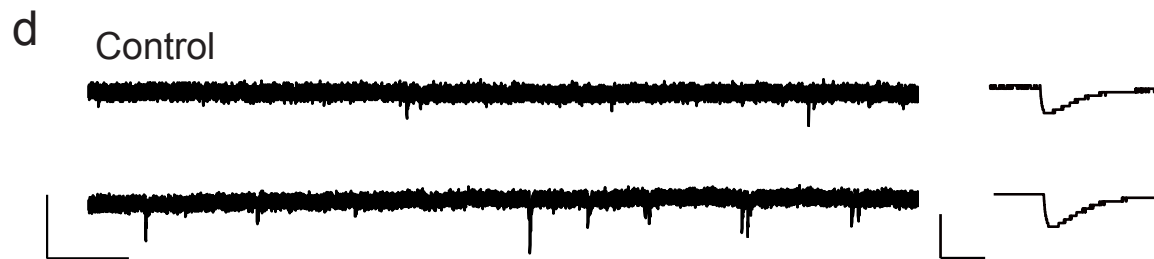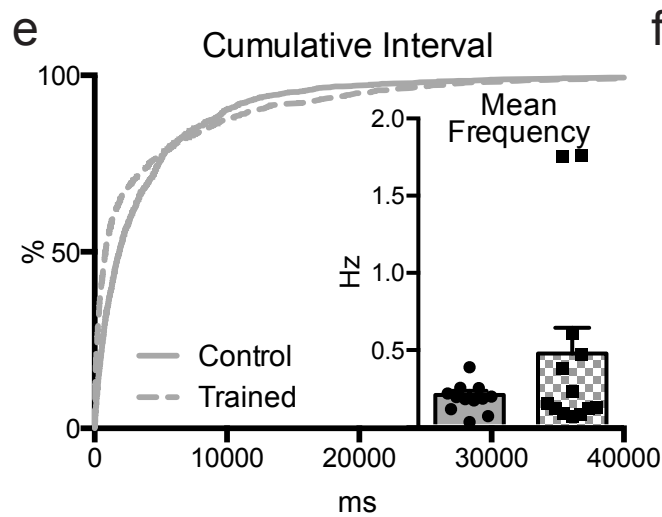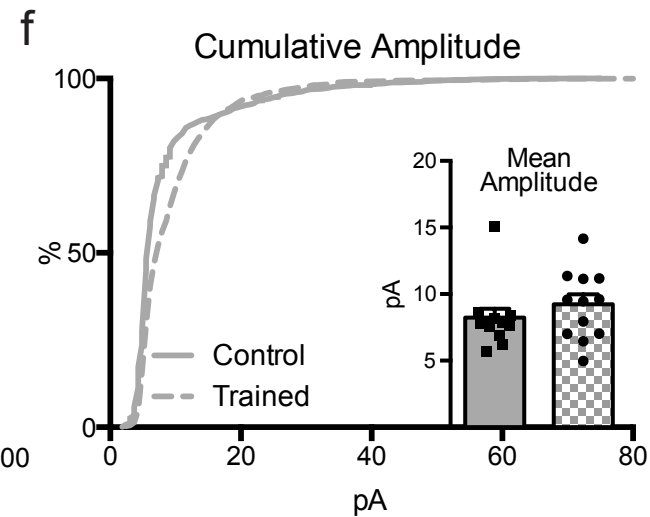



**a**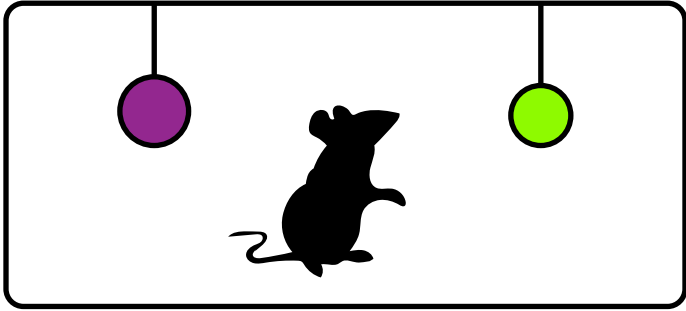**b**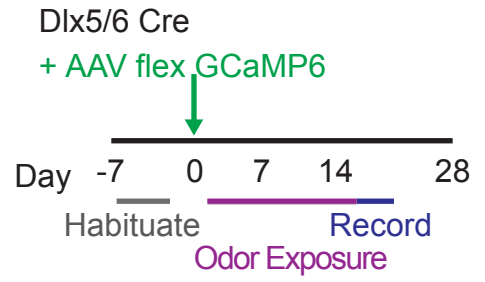**c**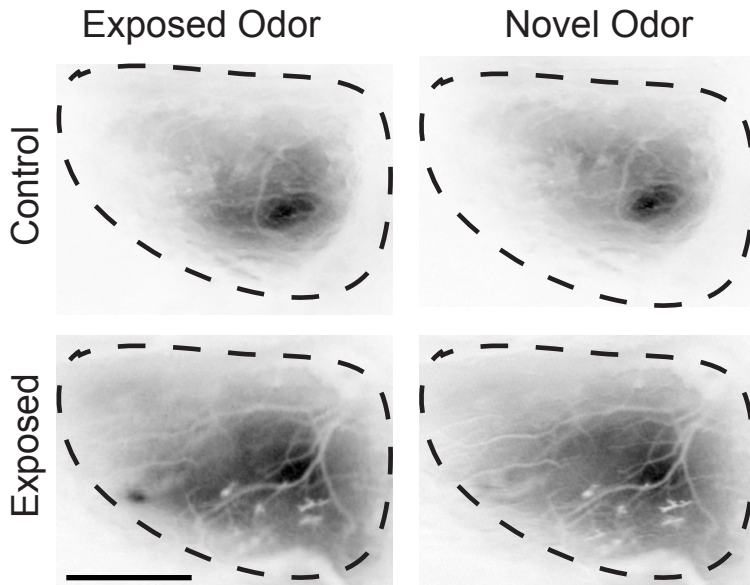**d**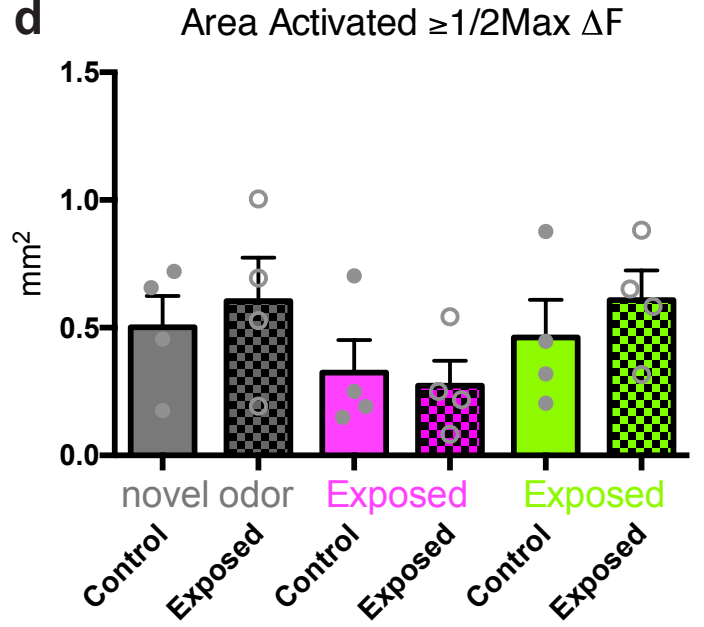

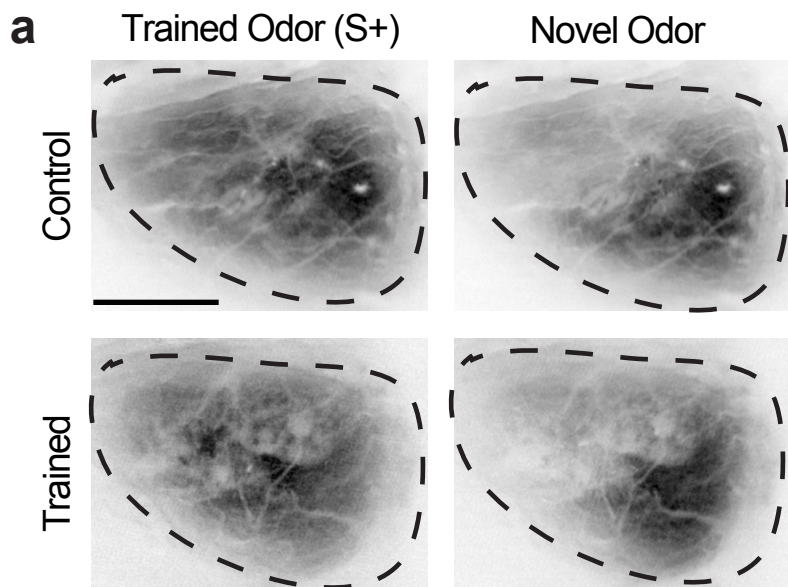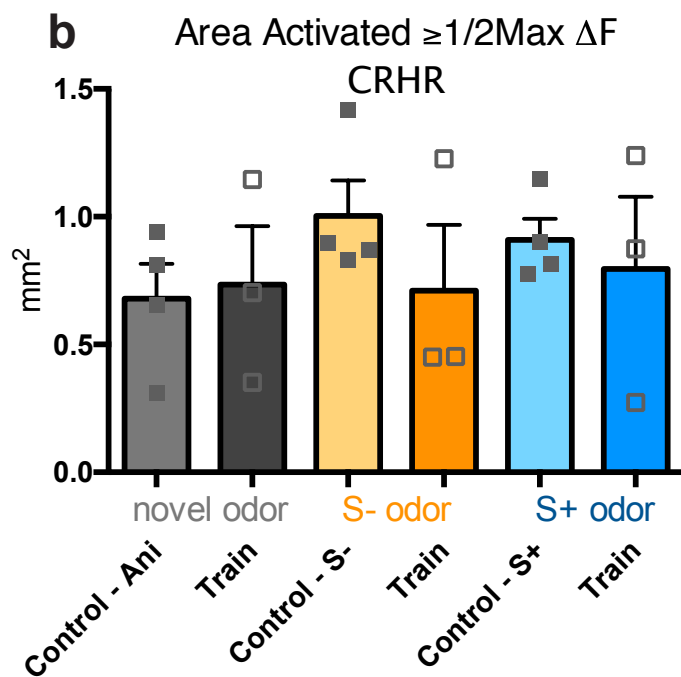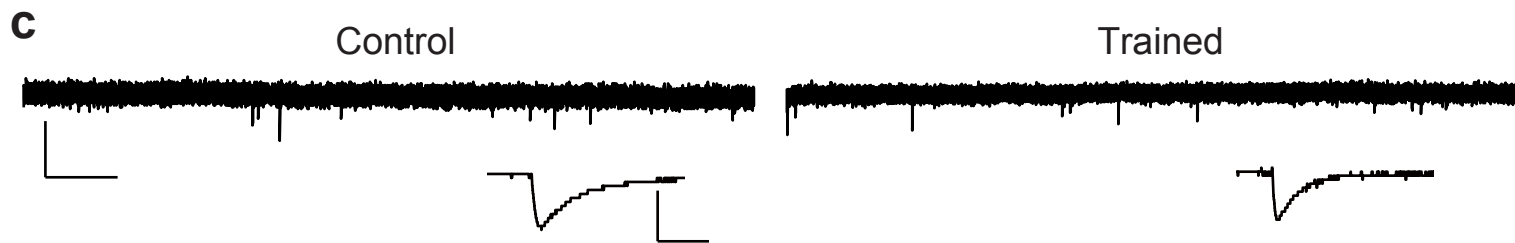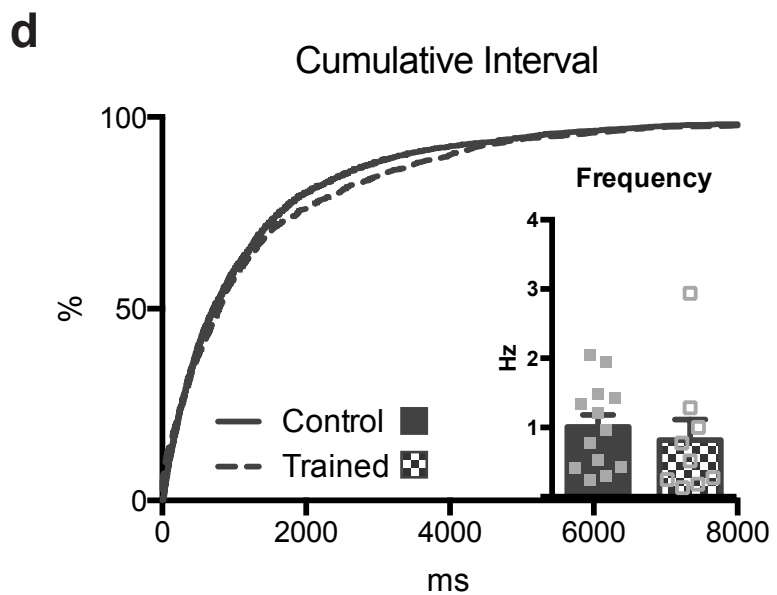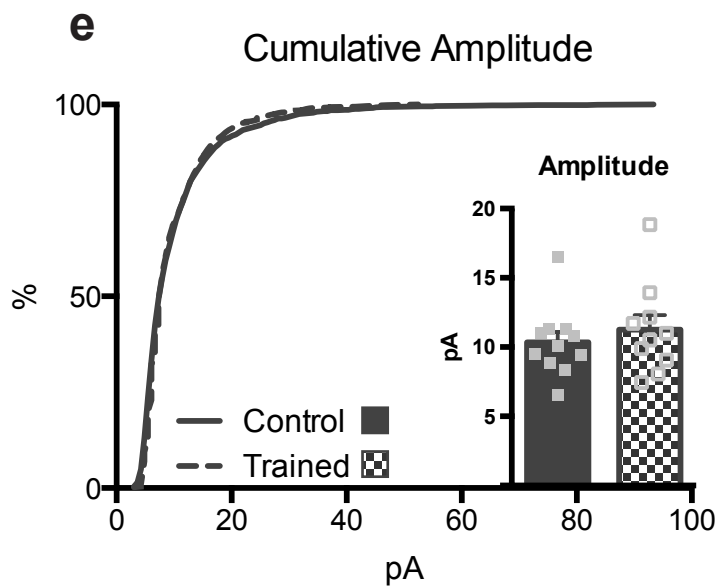

Supplement: NIHMS872596-supplement-supplemental.pdf [file NIHMS872596-supplement-supplemental.pdf]
